# Supplementary material
Source: PubMed Central journal article supplement (PMC3228139)
Supplement: supp_the2010-0230_Figure_5_secured.pdf [file supp_the2010-0230_Figure_5_secured.pdf]

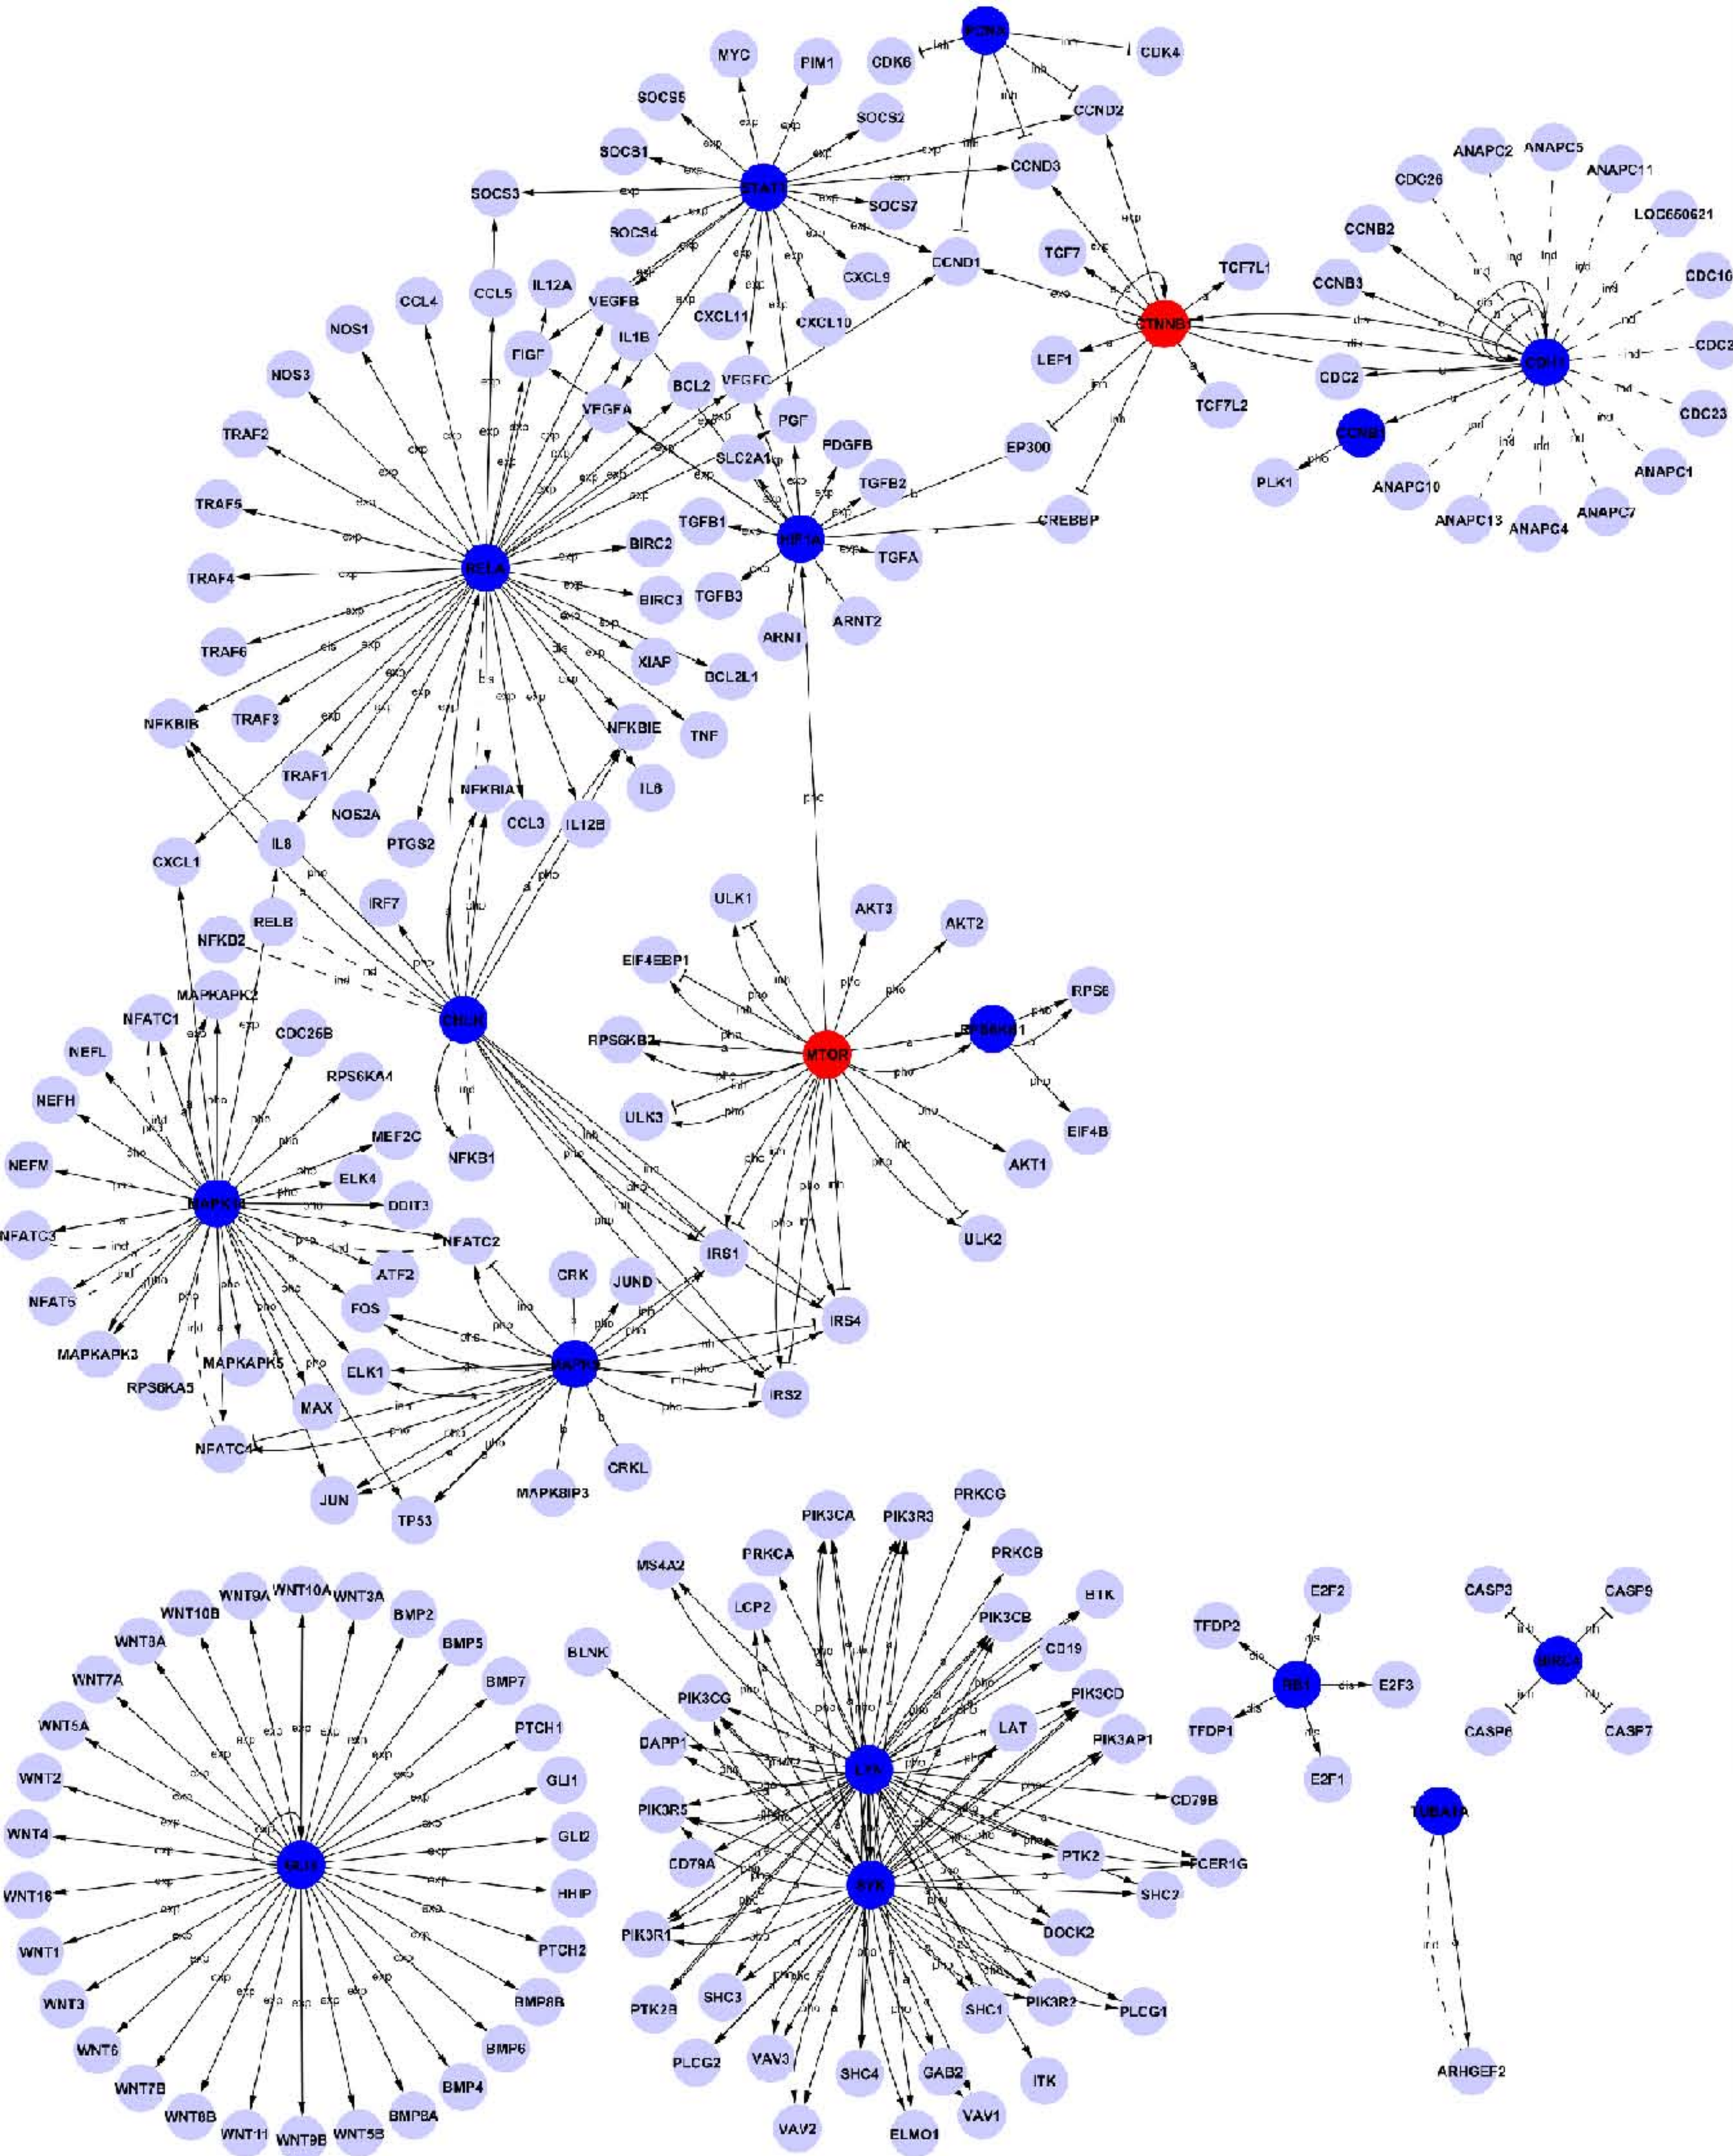

| Vertex  | Degree | Indegree | Outdegree |
|---------|--------|----------|-----------|
| LYN     | 45     | 0        | 45        |
| SYK     | 41     | 3        | 39        |
| RELA    | 39     | 2        | 38        |
| MAPK14  | 32     | 5        | 32        |
| GLI3    | 31     | 1        | 31        |
| CDH1    | 23     | 18       | 22        |
| MAPK9   | 22     | 3        | 22        |
| MTOR    | 22     | 0        | 22        |
| STAT1   | 19     | 0        | 19        |
| CHUK    | 19     | 4        | 19        |
| HIF1A   | 16     | 5        | 15        |
| CTNNB1  | 13     | 3        | 12        |
| IRS     | 6      | 6        | 0         |
| PCNA    | 5      | 0        | 5         |
| RPS6KB1 | 5      | 2        | 3         |
| RB1     | 5      | 0        | 5         |
| PIK3C   | 4      | 4        | 0         |
| CCND1   | 4      | 4        | 0         |
| BIRC4   | 4      | 0        | 4         |
| NFATC4  | 4      | 4        | 1         |
| PIK3R   | 4      | 4        | 0         |
| NFATC2  | 4      | 4        | 1         |
| PGF     | 3      | 3        | 0         |
| VEGF    | 3      | 3        | 0         |
| JUN     | 3      | 3        | 0         |
| NFKBI   | 3      | 3        | 0         |
| FCER1G  | 3      | 3        | 1         |
| TP53    | 3      | 3        | 0         |
| CCND    | 3      | 3        | 0         |
| IL8     | 3      | 3        | 0         |
| ELK1    | 3      | 3        | 0         |
| FOS     | 3      | 3        | 0         |
| FIGF    | 3      | 3        | 0         |
| BTK     | 2      | 2        | 0         |
| CREBBP  | 2      | 2        | 1         |
| RPS6    | 2      | 2        | 0         |
| NFKB1   | 2      | 2        | 1         |
| PIK3AP1 | 2      | 2        | 0         |
| ARHGEF2 | 2      | 2        | 1         |
| ELMO1   | 2      | 2        | 0         |
| CXCL1   | 2      | 2        | 0         |
| DAPP1   | 2      | 2        | 0         |
