# Supplementary material
Source: PubMed Central journal article supplement (PMC3228139)

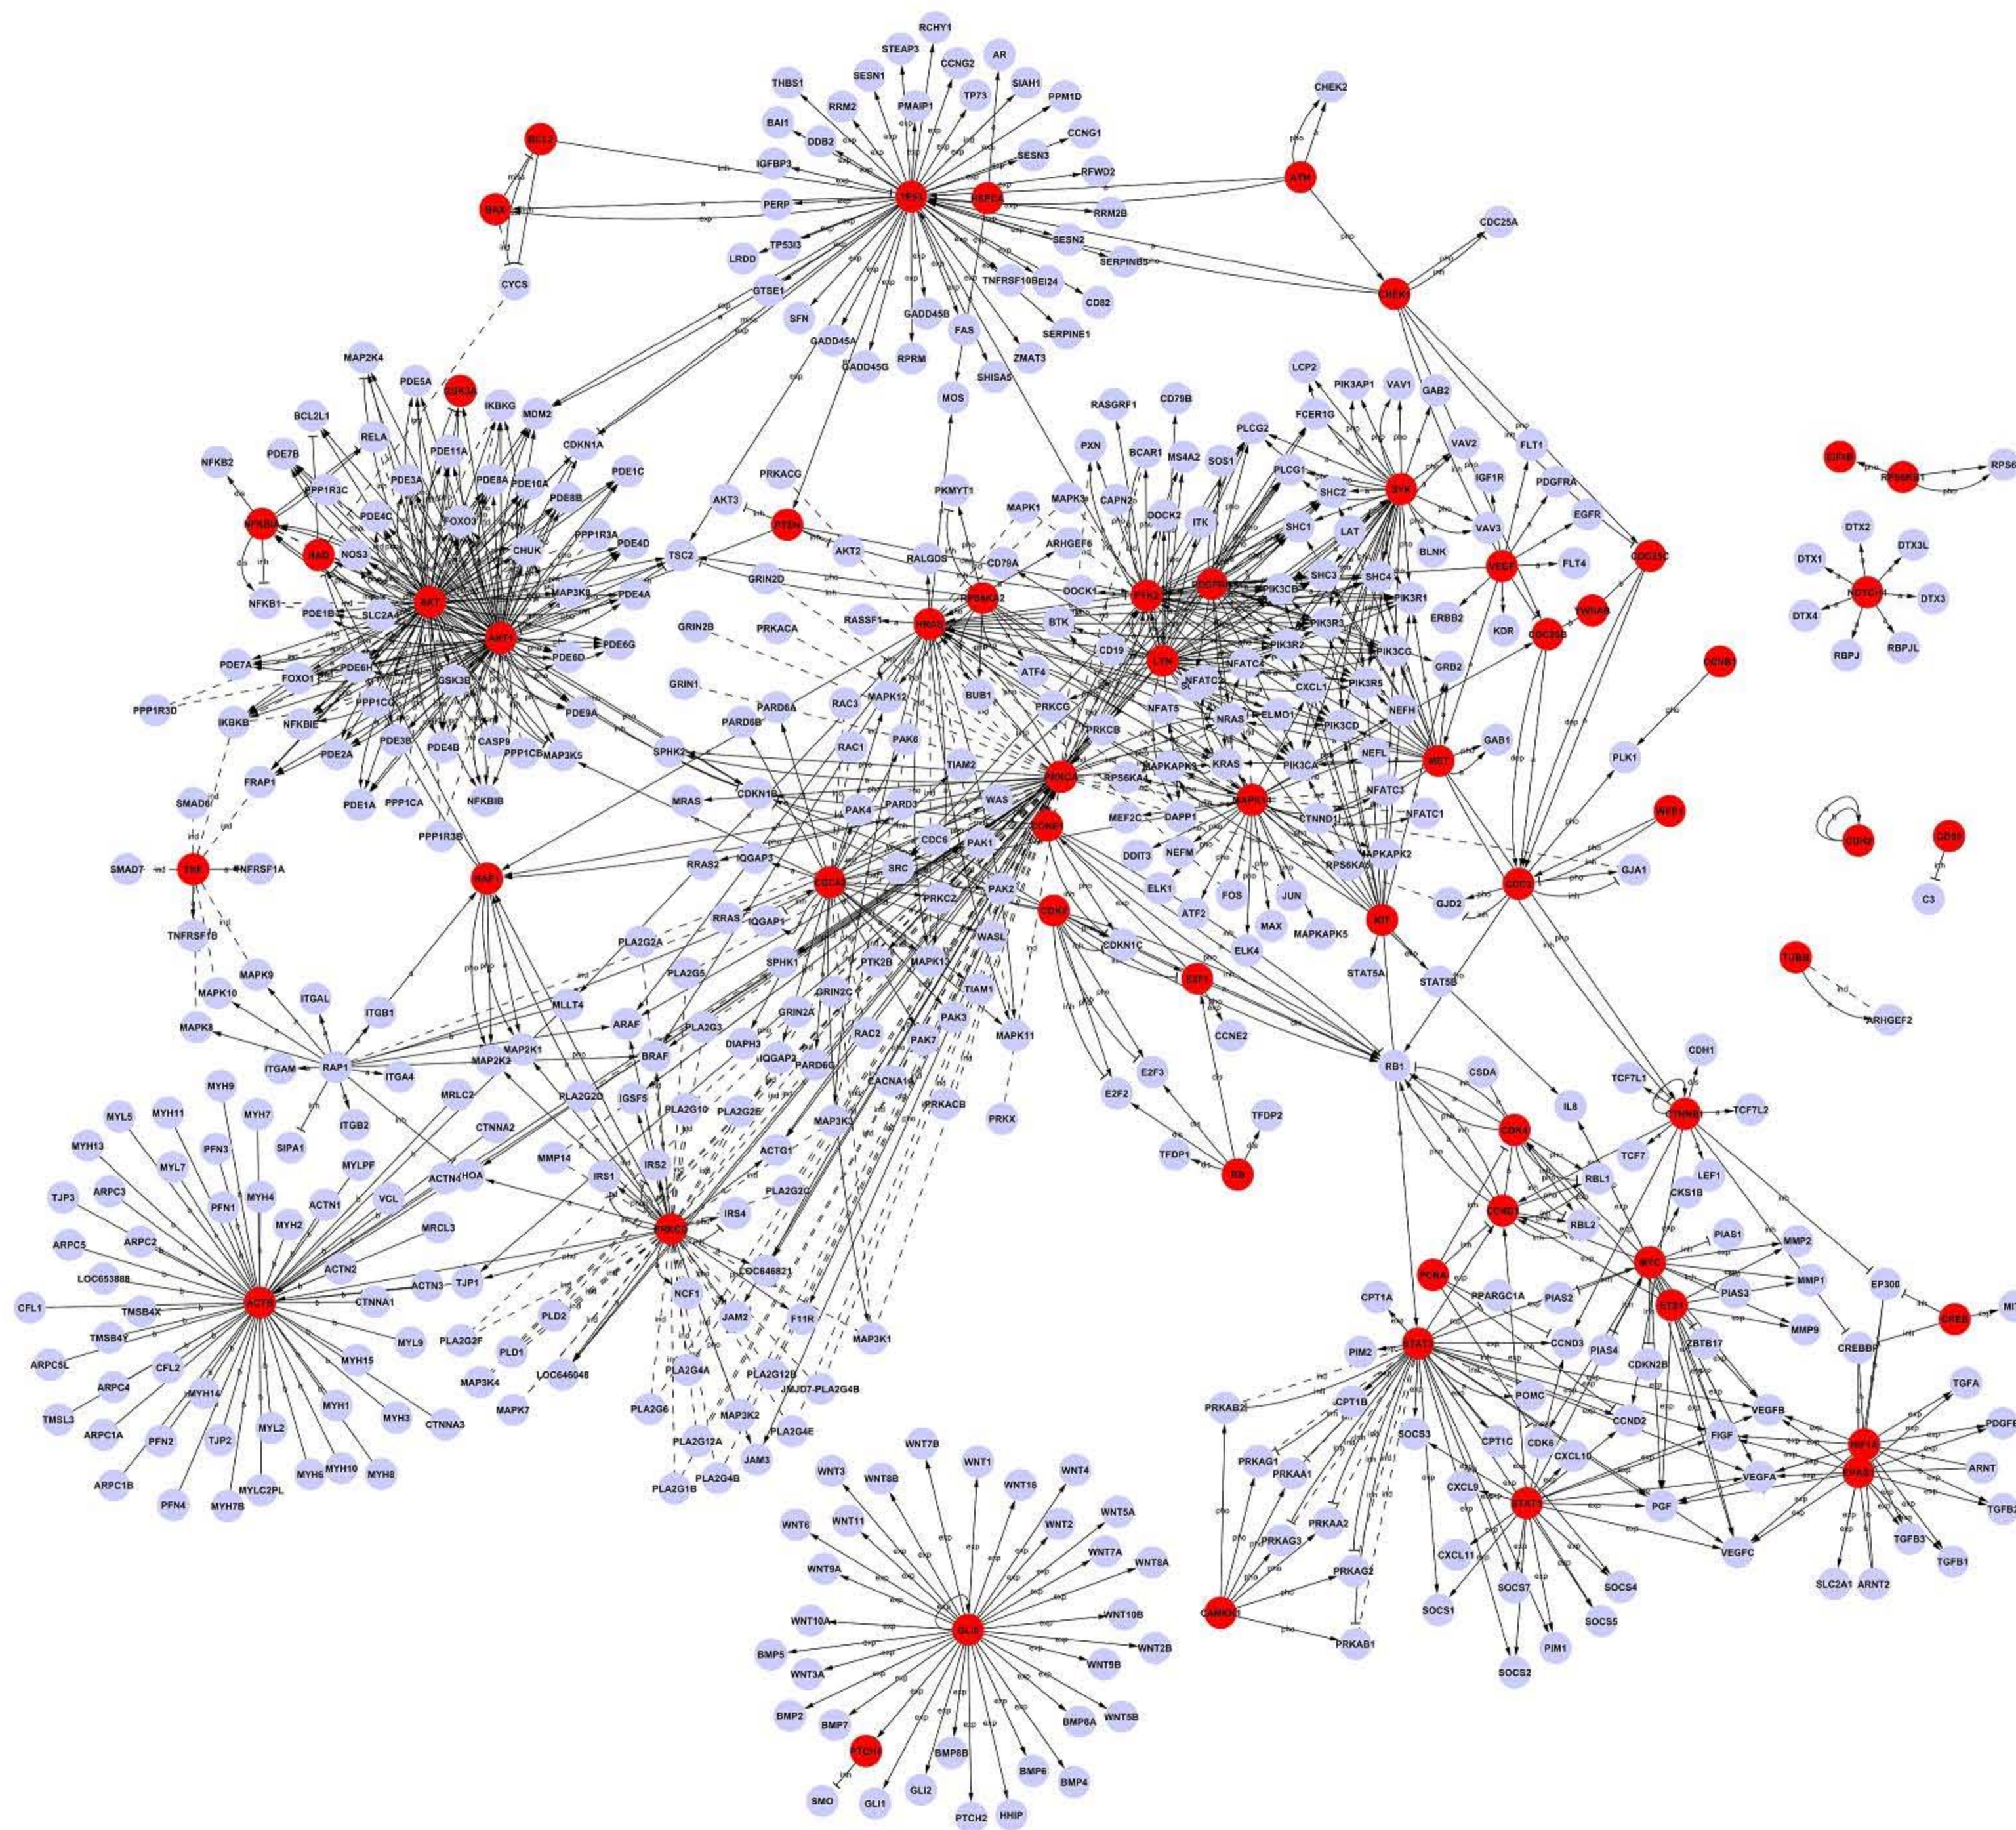

| Degree | Indegree | Outdegree |
|--------|----------|-----------|
| 102    | 1        | 101       |
| 84     | 4        | 83        |
| 54     | 54       | 51        |
| 50     | 6        | 44        |
| 50     | 0        | 50        |
| 45     | 0        | 45        |
| 42     | 8        | 34        |
| 41     | 3        | 39        |
| 38     | 1        | 37        |
| 36     | 4        | 32        |
| 35     | 10       | 26        |
| 32     | 2        | 30        |
| 32     | 1        | 32        |
| 29     | 1        | 28        |
| 24     | 1        | 23        |
| 22     | 2        | 20        |
| 19     | 0        | 19        |
| 16     | 1        | 16        |
| 15     | 8        | 8         |
| 15     | 4        | 15        |
| 15     | 4        | 15        |
| 15     | 0        | 15        |
| 15     | 0        | 15        |
| 14     | 0        | 14        |
| 14     | 14       | 0         |
| 13     | 3        | 11        |
| 12     | 6        | 6         |
| 12     | 5        | 9         |
| 12     | 6        | 6         |
| 11     | 6        | 5         |
| 11     | 0        | 11        |

II

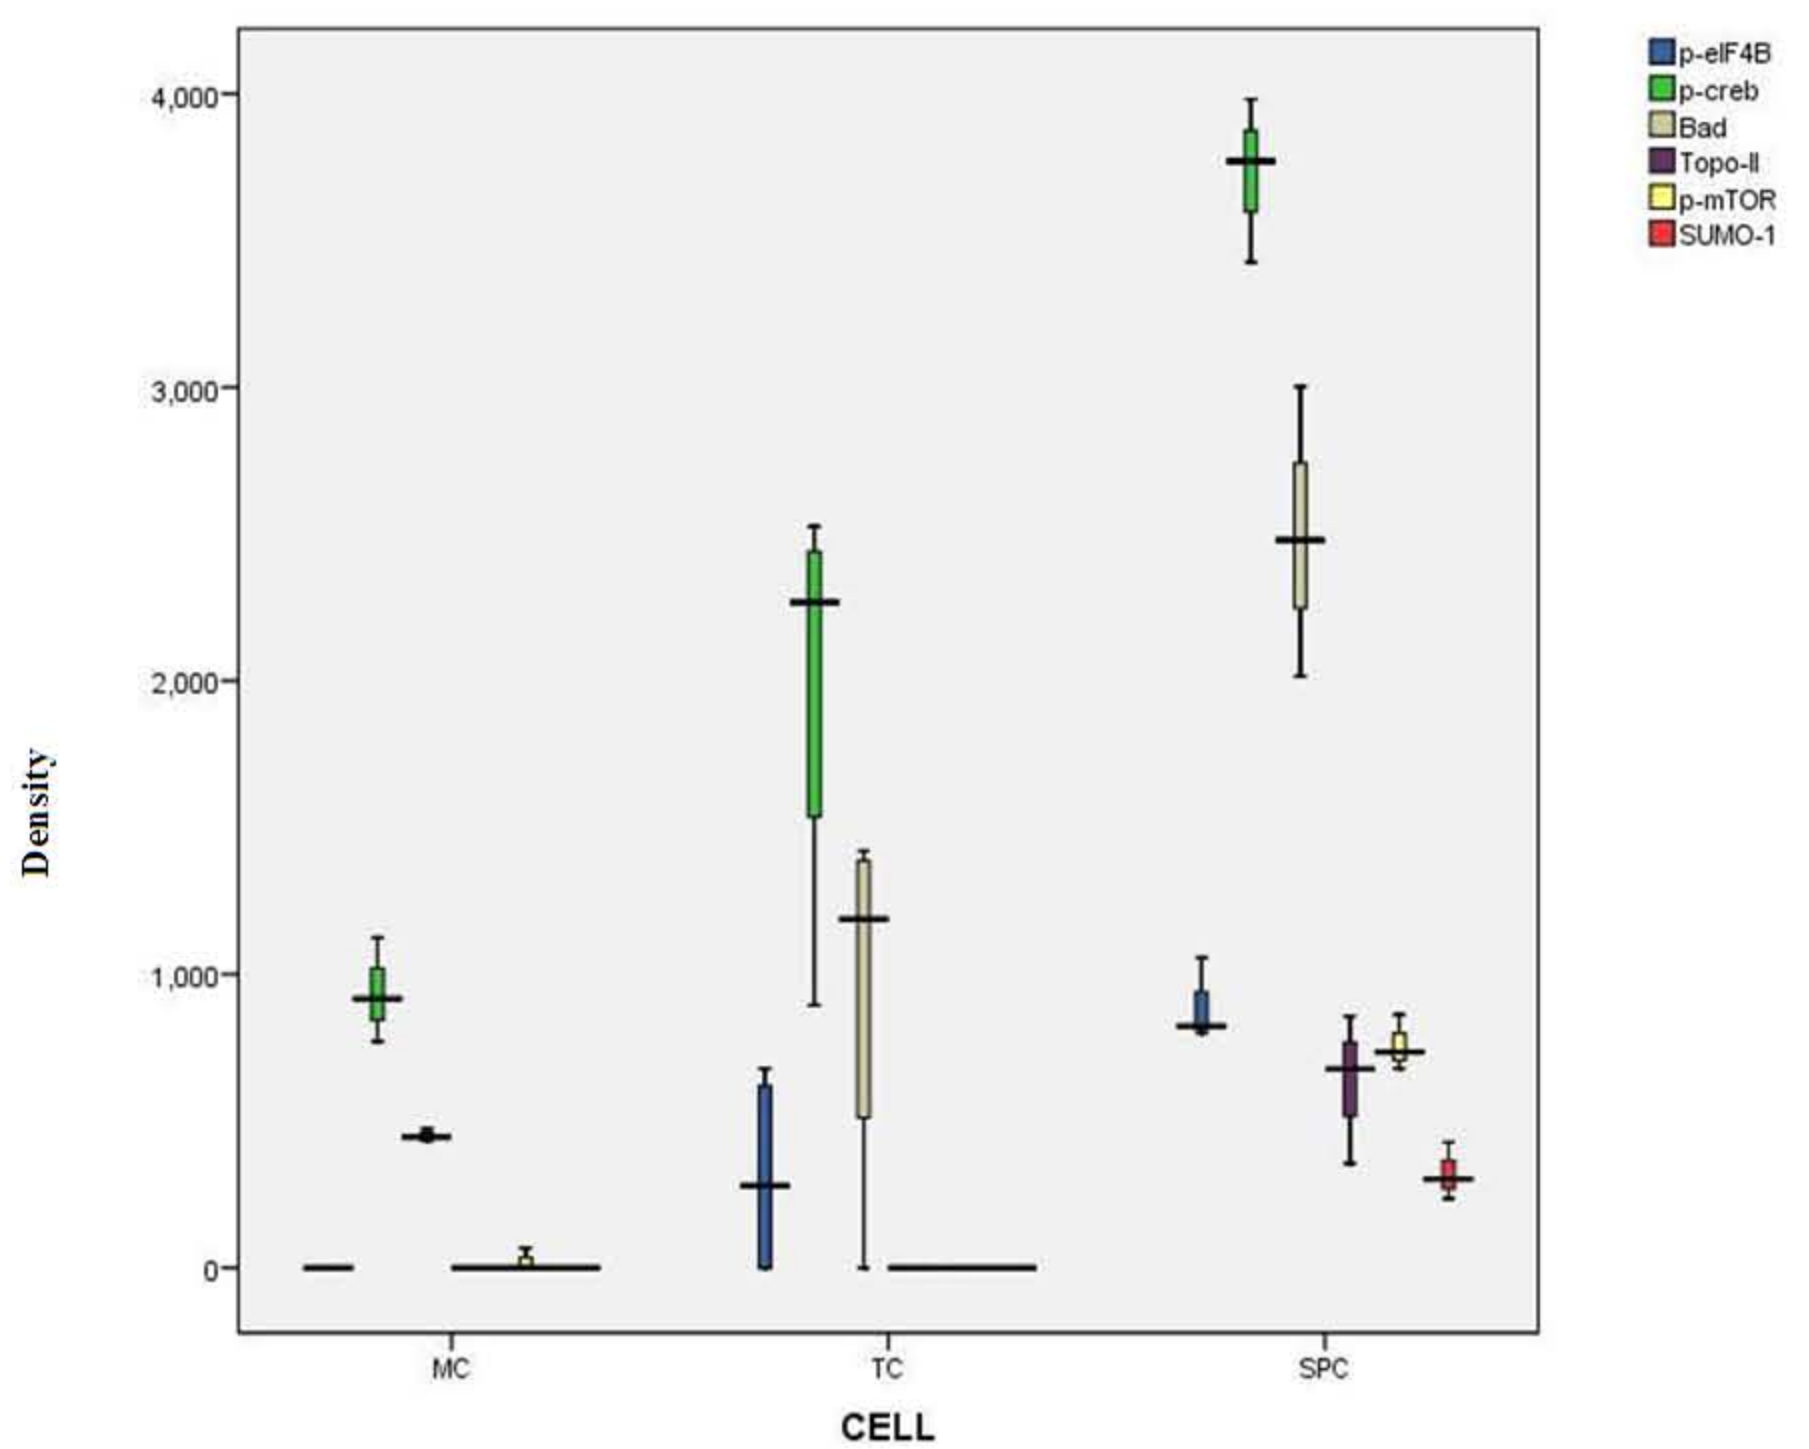

III

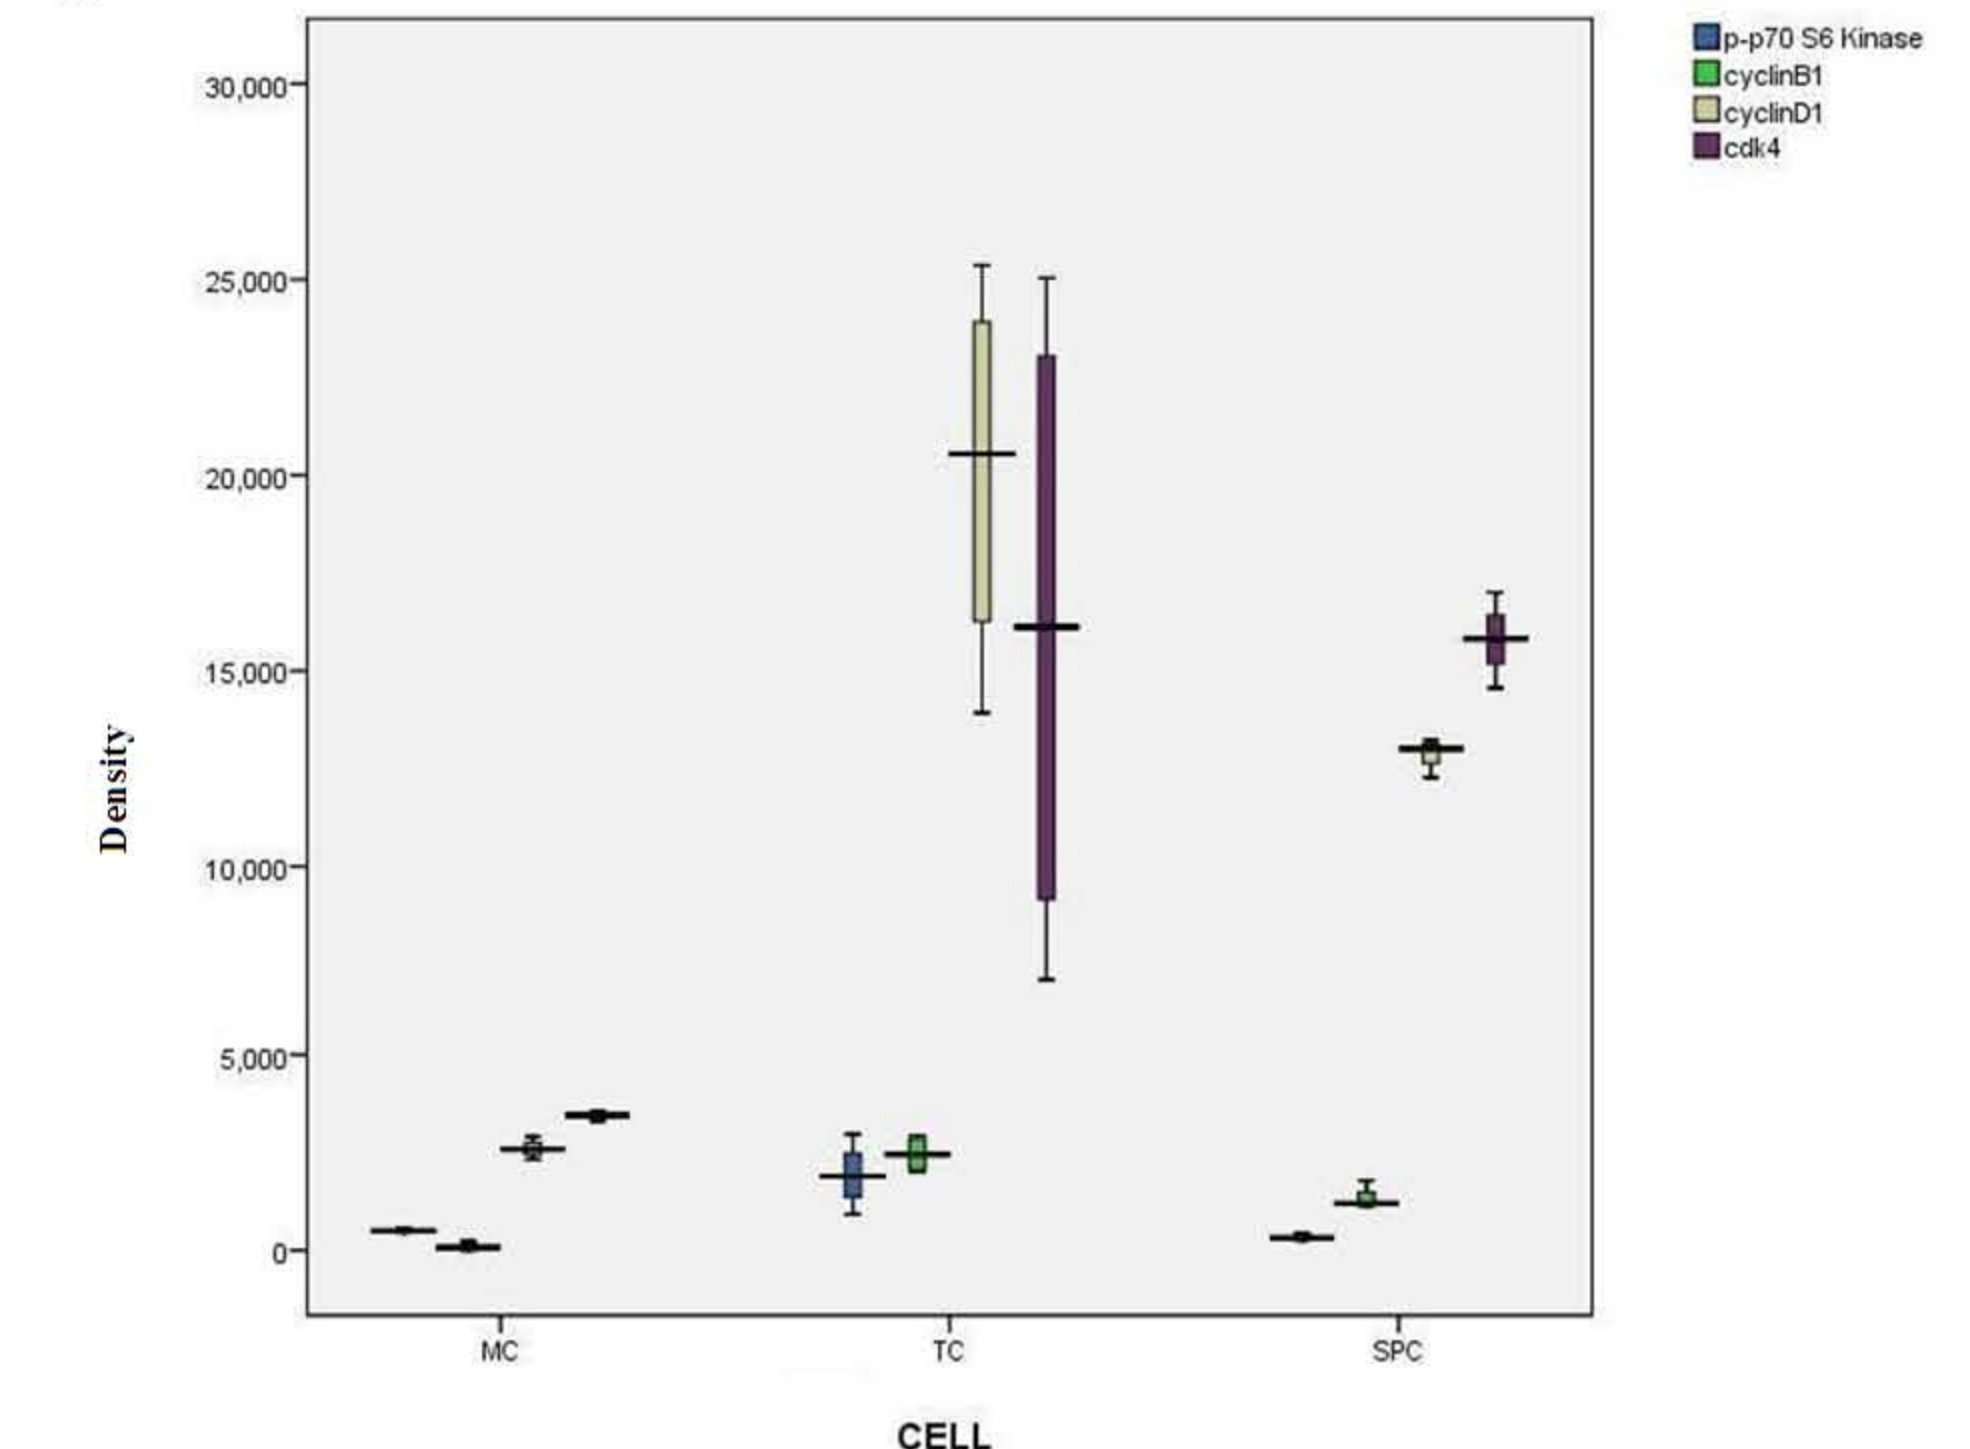

Supplement: supp_the2010-0230_Figure_6_secured.pdf [file supp_the2010-0230_Figure_6_secured.pdf]
